# Supplementary material for: Construction of metal–organic coordination networks with various metal-linker secondary building units: structures and properties
Source: Royal Society of Chemistry journal article supplement (doi:10.1039/c6nj01231k), 2016-01-01
Supplement: c6nj01231k1.pdf [file c6nj01231k1.pdf]

# **Construction of metal-organic coordination networks with various metal-linker secondary building units: structures and properties**

Yong-Qing Huang,<sup>\*a</sup> Yi Wan,<sup>a</sup> Huai-Ying Chen,<sup>a</sup> Yang Wang,<sup>a</sup> Yue Zhao,<sup>\*b</sup> and Xin-Feng Xiao<sup>a</sup>

<sup>a</sup>State Key Laboratory of Mining Disaster Prevention and Control Co-founded by Shandong Province and the Ministry of Science and Technology, Shandong University of Science and Technology, Qingdao 266590, China

<sup>b</sup>State Key Laboratory of Coordination Chemistry, School of Chemistry and Chemical Engineering, Nanjing University, Nanjing 210093, China.

**Corresponding Author:**

**Dr. Yong-Qing Huang**

**Email: yqhuangskd@163.com**

**Table S1. Selected bond distances (Å) and angles (°) for 1–3<sup>a</sup>**

| <b>1</b>                                      |            |                                               |            |
|-----------------------------------------------|------------|-----------------------------------------------|------------|
| Zn(1)-O(4)                                    | 1.967(3)   | Zn(1)-O(2) <sup>#1</sup>                      | 1.969(3)   |
| Zn(1)-N(2)                                    | 2.030(3)   | Zn(1)-O(5)                                    | 2.155(3)   |
| Zn(1)-O(7)                                    | 2.190(3)   | Zn(2)-O(8) <sup>#2</sup>                      | 1.979(2)   |
| Zn(2)-O(8) <sup>#3</sup>                      | 1.979(2)   | Zn(2)-O(6)                                    | 1.979(3)   |
| Zn(2)-O(6) <sup>#4</sup>                      | 1.979(3)   | Zn(3)-N(1) <sup>#5</sup>                      | 2.014(3)   |
| Zn(3)-N(1)                                    | 2.014(3)   | Zn(3)-O(3) <sup>#5</sup>                      | 2.183(3)   |
| Zn(3)-O(3)                                    | 2.183(3)   | Zn(3)-O(1) <sup>#5</sup>                      | 2.183(3)   |
| Zn(3)-O(1)                                    | 2.183(3)   |                                               |            |
| O(4)-Zn(1)-O(2) <sup>#1</sup>                 | 97.73(11)  | O(4)-Zn(1)-N(2)                               | 132.77(11) |
| O(2) <sup>#1</sup> -Zn(1)-N(2)                | 129.50(11) | O(4)-Zn(1)-O(5)                               | 98.99(12)  |
| O(2) <sup>#1</sup> -Zn(1)-O(5)                | 98.93(12)  | N(2)-Zn(1)-O(5)                               | 76.31(11)  |
| O(4)-Zn(1)-O(7)                               | 99.56(12)  | O(2) <sup>#1</sup> -Zn(1)-O(7)                | 99.85(12)  |
| N(2)-Zn(1)-O(7)                               | 75.17(10)  | O(5)-Zn(1)-O(7)                               | 151.46(10) |
| O(8) <sup>#2</sup> -Zn(2)-O(8) <sup>#2</sup>  | 116.95(16) | O(8) <sup>#2</sup> -Zn(2)-O(6) <sup>#4</sup>  | 97.06(11)  |
| O(8) <sup>#3</sup> -Zn(2)-O(6) <sup>#4</sup>  | 116.00(12) | O(8) <sup>#2</sup> -Zn(2)-O(6)                | 116.00(12) |
| O(8) <sup>#3</sup> -Zn(2)-O(6)                | 97.06(11)  | O(6) <sup>#4</sup> -Zn(2)-O(6)                | 115.07(17) |
| N(1)-Zn(3)-N(1) <sup>#5</sup>                 | 178.02(17) | N(1)-Zn(3)-O(3)                               | 76.57(11)  |
| N(1) <sup>#5</sup> -Zn(3)-O(3)                | 104.83(11) | N(1)-Zn(3)-O(3) <sup>#5</sup>                 | 104.83(11) |
| N(1) <sup>#5</sup> -Zn(3)-O(3) <sup>#5</sup>  | 76.57(11)  | O(3)-Zn(3)-O(3) <sup>#5</sup>                 | 93.47(16)  |
| N(1)-Zn(3)-O(1)                               | 76.45(11)  | N(1) <sup>#5</sup> -Zn(3)-O(1)                | 102.15(11) |
| O(3)-Zn(3)-O(1)                               | 153.02(9)  | O(3) <sup>#5</sup> -Zn(3)-O(1)                | 92.93(12)  |
| N(1)-Zn(3)-O(1) <sup>#5</sup>                 | 102.15(11) | N(1) <sup>#5</sup> -Zn(3)-O(1) <sup>#5</sup>  | 76.46(11)  |
| O(3)-Zn(3)-O(1) <sup>#5</sup>                 | 92.93(12)  | O(3) <sup>#5</sup> -Zn(3)-O(1) <sup>#5</sup>  | 153.02(9)  |
| O(1)-Zn(3)-O(1) <sup>#5</sup>                 | 93.15(16)  |                                               |            |
| <b>2</b>                                      |            |                                               |            |
| Pb(1)-N(1)                                    | 2.493(7)   | Pb(1)-O(3)                                    | 2.536(6)   |
| Pb(1)-O(1)                                    | 2.605(6)   | Pb(1)-O(1) <sup>#6</sup>                      | 2.620(6)   |
| Pb(1)-O(2) <sup>#6</sup>                      | 2.628(8)   | Pb(1)-O(3) <sup>#7</sup>                      | 2.683(6)   |
| Ca(1)-O(4) <sup>#8</sup>                      | 2.372(6)   | Ca(1)-O(4) <sup>#9</sup>                      | 2.372(6)   |
| Ca(1)-O(4) <sup>#10</sup>                     | 2.372(6)   | Ca(1)-O(4) <sup>#11</sup>                     | 2.372(6)   |
| Ca(1)-O(4)                                    | 2.372(6)   | Ca(1)-O(4) <sup>#12</sup>                     | 2.372(6)   |
| N(1)-Pb(1)-O(3)                               | 64.2(2)    | N(1)-Pb(1)-O(1)                               | 64.3(2)    |
| O(3)-Pb(1)-O(1)                               | 127.7(2)   | N(1)-Pb(1)-O(1) <sup>#6</sup>                 | 74.9(2)    |
| O(3)-Pb(1)-O(1) <sup>#6</sup>                 | 72.4(2)    | O(1)-Pb(1)-O(1) <sup>#6</sup>                 | 102.7(3)   |
| N(1)-Pb(1)-O(2) <sup>#6</sup>                 | 100.9(3)   | O(3)-Pb(1)-O(2) <sup>#6</sup>                 | 121.6(2)   |
| O(1)-Pb(1)-O(2) <sup>#6</sup>                 | 77.3(2)    | O(1) <sup>#6</sup> -Pb(1)-O(2) <sup>#6</sup>  | 49.5(2)    |
| N(1)-Pb(1)-O(3) <sup>#7</sup>                 | 128.8(2)   | O(3)-Pb(1)-O(3) <sup>#7</sup>                 | 66.2(3)    |
| O(1)-Pb(1)-O(3) <sup>#7</sup>                 | 166.1(2)   | O(1) <sup>#6</sup> -Pb(1)-O(3) <sup>#6</sup>  | 78.9(2)    |
| O(2) <sup>#6</sup> -Pb(1)-O(3) <sup>#7</sup>  | 94.0(2)    | O(4) <sup>#8</sup> -Ca(1)-O(4) <sup>#9</sup>  | 88.0(2)    |
| O(4) <sup>#8</sup> -Ca(1)-O(4) <sup>#10</sup> | 179.999(1) | O(4) <sup>#9</sup> -Ca(1)-O(4) <sup>#10</sup> | 92.0(2)    |
| O(4) <sup>#8</sup> -Ca(1)-O(4) <sup>#11</sup> | 88.0(2)    | O(4) <sup>#9</sup> -Ca(1)-O(4) <sup>#11</sup> | 88.0(2)    |

|                                                |            |                                                |         |
|------------------------------------------------|------------|------------------------------------------------|---------|
| O(4) <sup>#10</sup> -Ca(1)-O(4) <sup>#11</sup> | 92.0(2)    | O(4) <sup>#8</sup> -Ca(1)-O(4)                 | 92.0(2) |
| O(4) <sup>#9</sup> -Ca(1)-O(4)                 | 179.998(1) | O(4) <sup>#10</sup> -Ca(1)-O(4)                | 88.0(2) |
| O(4) <sup>#11</sup> -Ca(1)-O(4)                | 92.0(2)    | O(4) <sup>#8</sup> -Ca(1)-O(4) <sup>#12</sup>  | 92.0(2) |
| O(4) <sup>#9</sup> -Ca(1)-O(4) <sup>#12</sup>  | 92.0(2)    | O(4) <sup>#10</sup> -Ca(1)-O(4) <sup>#12</sup> | 88.0(2) |
| O(4) <sup>#11</sup> -Ca(1)-O(4) <sup>#12</sup> | 179.998(1) | O(4)-Ca(1)-O(4) <sup>#12</sup>                 | 88.0(2) |

### 3

|                                                 |            |                                                 |            |
|-------------------------------------------------|------------|-------------------------------------------------|------------|
| Ce(1)-O(1) <sup>#13</sup>                       | 2.5027(18) | Ce(1)-O(1) <sup>#14</sup>                       | 2.5027(18) |
| Ce(1)-O(1) <sup>#15</sup>                       | 2.5027(18) | Ce(1)-O(1)                                      | 2.5027(18) |
| Ce(1)-O(1) <sup>#16</sup>                       | 2.5027(18) | Ce(1)-O(1) <sup>#17</sup>                       | 2.5027(18) |
| Ce(1)-N(1) <sup>#15</sup>                       | 2.605(3)   | Ce(1)-N(1)                                      | 2.605(3)   |
| Ce(1)-N(1) <sup>#17</sup>                       | 2.605(3)   | Mg(1)-O(2)                                      | 2.0798(16) |
| Mg(1)-O(2) <sup>#18</sup>                       | 2.0798(16) | Mg(1)-O(2) <sup>#19</sup>                       | 2.0798(16) |
| Mg(1)-O(2) <sup>#20</sup>                       | 2.0798(16) | Mg(1)-O(1W)                                     | 2.113(2)   |
| Mg(1)-O(1W) <sup>#18</sup>                      | 2.113(2)   |                                                 |            |
| O(1) <sup>#13</sup> -Ce(1)-O(1) <sup>#14</sup>  | 81.31(7)   | O(1) <sup>#13</sup> -Ce(1)-O(1) <sup>#15</sup>  | 124.22(8)  |
| O(1) <sup>#14</sup> -Ce(1)-O(1) <sup>#15</sup>  | 83.82(10)  | O(1) <sup>#13</sup> -Ce(1)-O(1)                 | 147.91(9)  |
| O(1) <sup>#14</sup> -Ce(1)-O(1)                 | 124.22(8)  | O(1) <sup>#15</sup> -Ce(1)-O(1)                 | 81.31(7)   |
| O(1) <sup>#13</sup> -Ce(1)-O(1) <sup>#16</sup>  | 81.32(7)   | O(1) <sup>#14</sup> -Ce(1)-O(1) <sup>#16</sup>  | 81.32(7)   |
| O(1) <sup>#15</sup> -Ce(1)-O(1) <sup>#16</sup>  | 147.91(9)  | O(1)-Ce(1)-O(1) <sup>#16</sup>                  | 83.82(10)  |
| O(1) <sup>#13</sup> -Ce(1)-O(1) <sup>#17</sup>  | 83.82(10)  | O(1) <sup>#14</sup> -Ce(1)-O(1) <sup>#17</sup>  | 147.91(9)  |
| O(1) <sup>#15</sup> -Ce(1)-O(1) <sup>#17</sup>  | 81.32(7)   | O(1)-Ce(1)-O(1) <sup>#17</sup>                  | 81.32(7)   |
| O(1) <sup>#16</sup> -Ce(1)-O(1) <sup>#17</sup>  | 124.22(8)  | O(1) <sup>#13</sup> -Ce(1)-N(1) <sup>#15</sup>  | 62.11(4)   |
| O(1) <sup>#14</sup> -Ce(1)-N(1) <sup>#15</sup>  | 73.96(4)   | O(1) <sup>#15</sup> -Ce(1)-N(1) <sup>#15</sup>  | 62.11(4)   |
| O(1)-Ce(1)-N(1) <sup>#15</sup>                  | 138.09(5)  | O(1) <sup>#16</sup> -Ce(1)-N(1) <sup>#15</sup>  | 138.09(5)  |
| O(1) <sup>#17</sup> -Ce(1)-N(1) <sup>#15</sup>  | 73.95(4)   | O(1) <sup>#13</sup> -Ce(1)-N(1)                 | 138.09(5)  |
| O(1) <sup>#14</sup> -Ce(1)-N(1)                 | 62.11(4)   | O(1) <sup>#15</sup> -Ce(1)-N(1)                 | 73.96(4)   |
| O(1)-Ce(1)-N(1)                                 | 62.11(4)   | O(1) <sup>#16</sup> -Ce(1)-N(1)                 | 73.96(4)   |
| O(1) <sup>#17</sup> -Ce(1)-N(1)                 | 138.09(5)  | N(1) <sup>#15</sup> -Ce(1)-N(1)                 | 120.0      |
| O(1) <sup>#13</sup> -Ce(1)-N(1) <sup>#17</sup>  | 73.96(4)   | O(1) <sup>#14</sup> -Ce(1)-N(1) <sup>#17</sup>  | 138.09(5)  |
| O(1) <sup>#15</sup> -Ce(1)-N(1) <sup>#17</sup>  | 138.09(5)  | O(1)-Ce(1)-N(1) <sup>#17</sup>                  | 73.96(4)   |
| O(1) <sup>#16</sup> -Ce(1)-N(1) <sup>#17</sup>  | 62.11(4)   | O(1) <sup>#17</sup> -Ce(1)-N(1) <sup>#17</sup>  | 62.11(4)   |
| N(1) <sup>#15</sup> -Ce(1)-N(1) <sup>#17</sup>  | 120.0      | N(1)-Ce(1)-N(1) <sup>#17</sup>                  | 120.0      |
| O(2)-Mg(1)-O(2) <sup>#18</sup>                  | 180.0      | O(2)-Mg(1)-O(2) <sup>#19</sup>                  | 93.07(10)  |
| O(2) <sup>#18</sup> -Mg(1)-O(2) <sup>#19</sup>  | 86.93(10)  | O(2)-Mg(1)-O(2) <sup>#20</sup>                  | 86.93(10)  |
| O(2) <sup>#18</sup> -Mg(1)-O(2) <sup>#20</sup>  | 93.07(10)  | O(2) <sup>#19</sup> -Mg(1)-O(2) <sup>#20</sup>  | 180.0      |
| O(2)-Mg(1)-O(1W)                                | 91.71(6)   | O(2) <sup>#18</sup> -Mg(1)-O(1W)                | 88.29(6)   |
| O(2) <sup>#19</sup> -Mg(1)-O(1W)                | 88.29(6)   | O(2) <sup>#20</sup> -Mg(1)-O(1W)                | 91.71(6)   |
| O(2)-Mg(1)-O(1W) <sup>#18</sup>                 | 88.29(6)   | O(2) <sup>#18</sup> -Mg(1)-O(1W) <sup>#18</sup> | 91.71(6)   |
| O(2) <sup>#19</sup> -Mg(1)-O(1W) <sup>#18</sup> | 91.71(6)   | O(2) <sup>#20</sup> -Mg(1)-O(1W) <sup>#18</sup> | 88.29(6)   |
| O(1W)-Mg(1)-O(1W) <sup>#18</sup>                | 180.0      |                                                 |            |

<sup>a</sup>Symmetry transformations used to generate equivalent atoms: #1  $x+1/2, y-1/2, z$ ; #2  $-x+1/2, y+1/2, -z+1/2$ ; #3  $x+1/2, y+1/2, z$ ; #4  $-x+1, y, -z+1/2$ ; #5  $-x, y, -z+1/2$ ; #6  $x-y+2/3, x+1/3, -z+1/3$ ; #7  $-x-1/3, -y+4/3, -z+1/3$ ; #8  $x-y+1/3, x+2/3, -z+2/3$ ; #9  $-x-2/3, -y+2/3, -z+2/3$ ; #10

-x+y-1, -x, z; #11 y-2/3, -x+y-1/3, -z+2/3; #12 -y, x-y+1, z; #13 -x+y-1, y, -z-1/2; #14 -y, -x, -z-1/2; #15 -x+y-1, -x, z; #16 x, x-y+1, -z-1/2; #17 -y, x-y+1, z; #18 -x, -y+1, -z; #19 -x, -y+1, z; #20 x, y, -z.

---

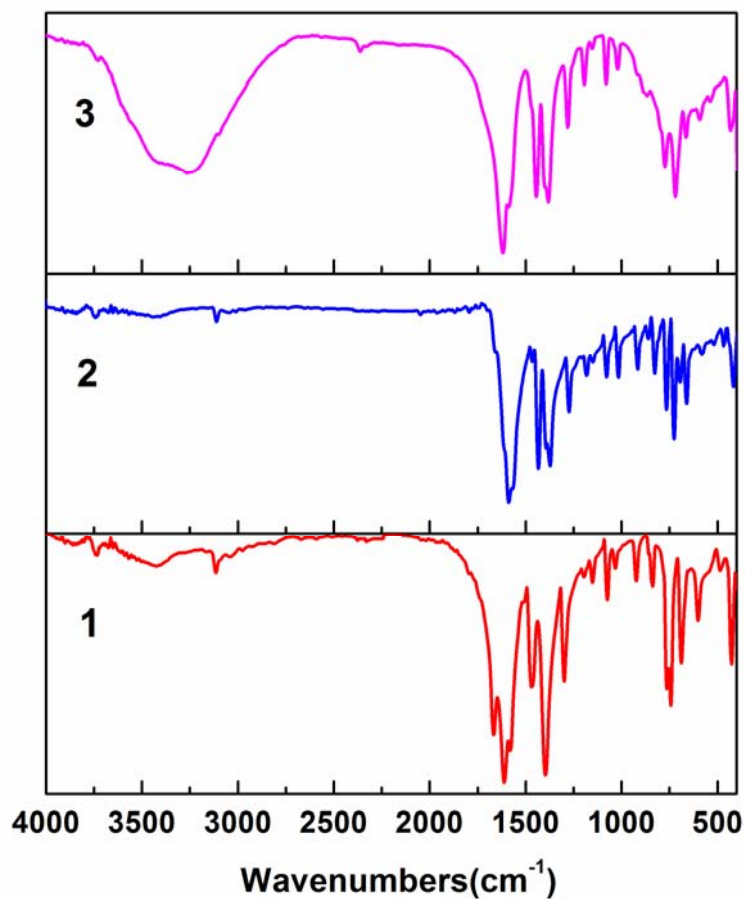

**Fig. S1** The IR spectra of complexes 1-3.

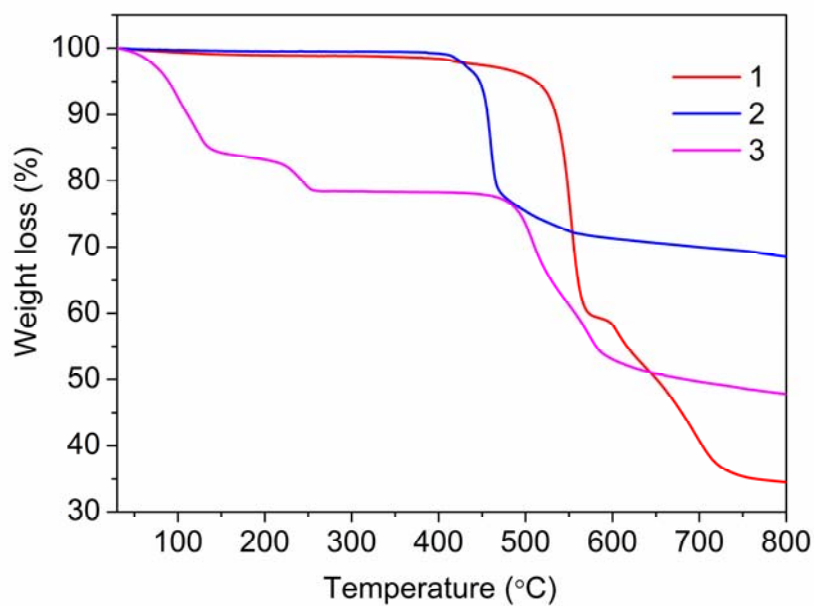

**Fig. S2** TGA plots of complexes 1–3.

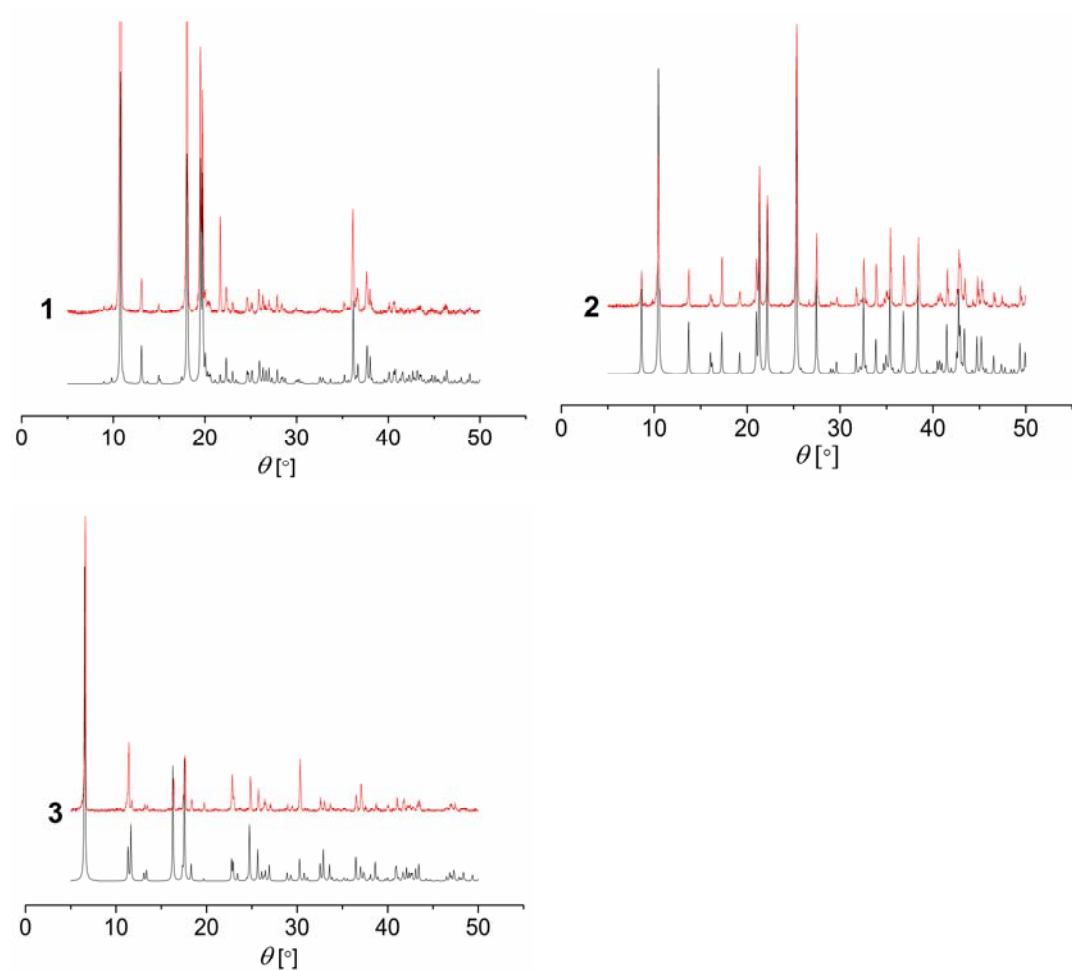

**Fig. S3** PXRD patterns of complexes 1–3. Down: calculated from single crystal data; Top: experimental.

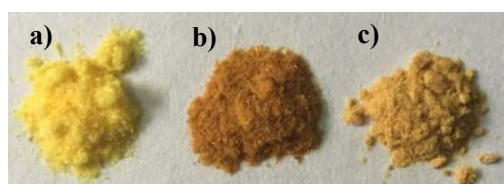

**Fig. S4** Photographs of complex 3: (a) as-synthesized crystalline samples of 3; (b) after adsorption of iodine; c) after desorption of iodine in the ethanol solution.

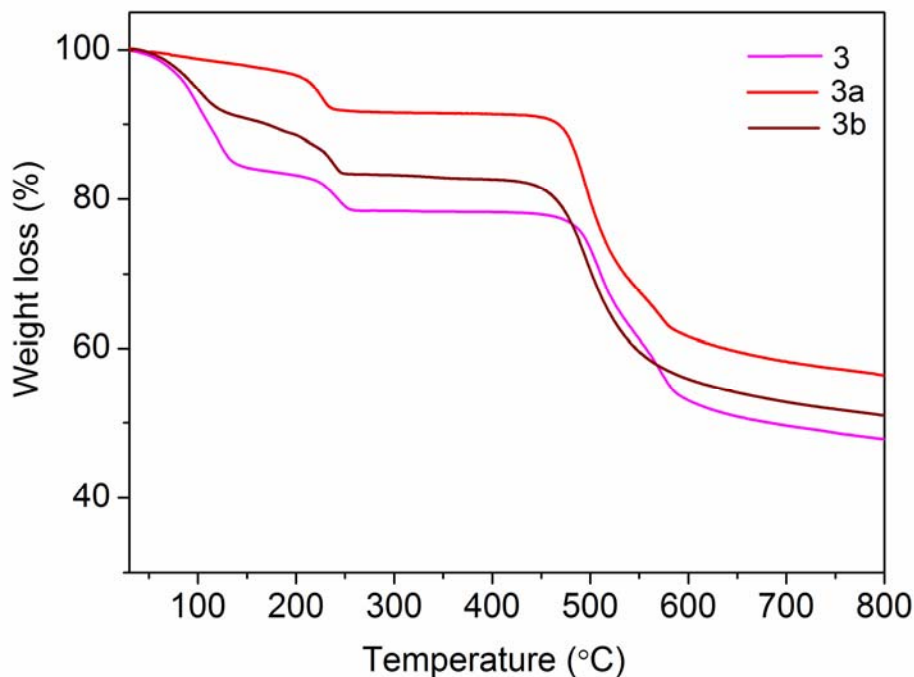

**Fig. S5** Thermogravimetric analysis for **3a** shows a weight loss of 8.2% between 30 to 240 °C, which corresponds to the loss of coordinated water molecules and some adsorbed water molecules, implying the guest water molecules in the channels of **3** have been removed after heating in the vacuum oven at 140°C for 12 hours. Thermogravimetric analysis for **3b** shows a weight loss of 8.9% between 30 to 135 °C, which corresponds to the loss of iodine molecules. Upon further heating, a weight loss of 7.4% between 135 to 246 °C occurs due to the removal of coordinated water molecules.

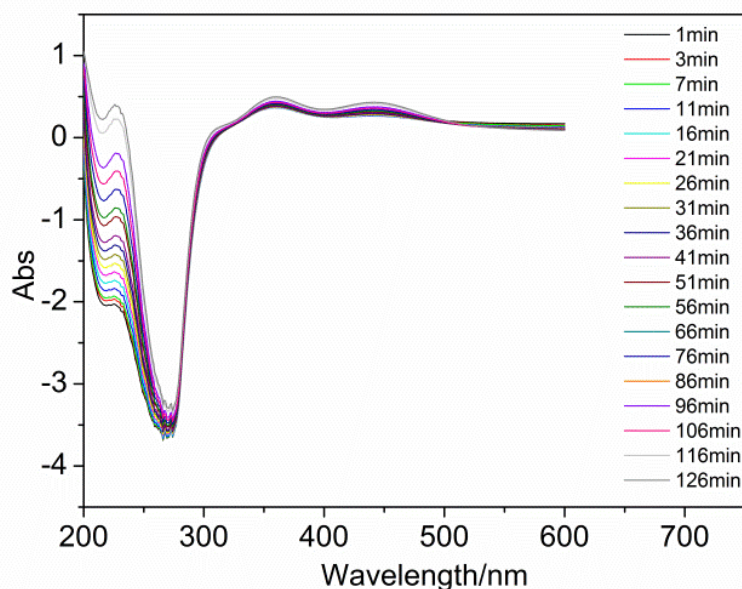

**Fig. S6** UV/vis absorption spectra for the release of the I<sub>2</sub> into ethanol solution.

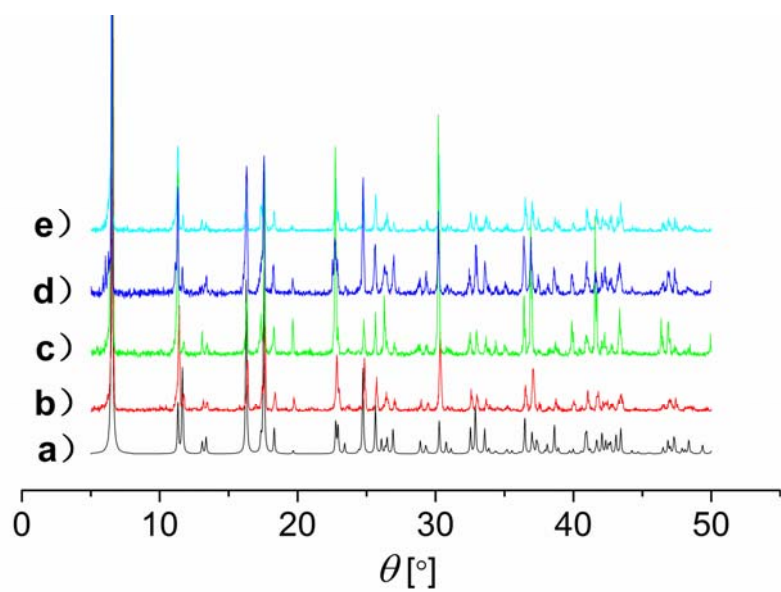

**Fig. S7** PXRD patterns monitoring the adsorption and desorption of iodine for complex **3**. a) Calculated from single crystal data; b) as-synthesized bulk crystalline sample; c) after desorption of guest water molecules at 140 °C for 12 h; d) after adsorption of iodine; e) after desorption of iodine in the ethanol solution.
